# Supplementary material for: Genome-wide identification and comprehensive analysis of the NAC transcription factor family in Sesamum indicum
Source: PLoS One. 2018 Jun 21;13(6):e0199262. doi: 10.1371/journal.pone.0199262 (PMC6013105; doi:10.1371/journal.pone.0199262)
Supplement: S1 Table — (XLSX) [file pone.0199262.s006.xlsx]

## Sheet: Sheet1
S1 Table. The accession numbers of NACs in Arabidopsis, O. sativa, and V. vinifera.
Speces	Locus name	Nomenclature	Alias	Length
Arabidopsis	AT1G01010.1	ANAC001	NTL10	429
Arabidopsis	AT1G01720.1	ANAC002	ATAF1	289
Arabidopsis	AT1G02220.1	ANAC003		394
Arabidopsis	AT1G02230.1	ANAC004		359
Arabidopsis	AT1G02250.1	ANAC005		350
Arabidopsis	AT1G03490.1	ANAC006		281
Arabidopsis	AT1G12260.1	ANAC007	VND4	395
Arabidopsis	AT1G25580.1	ANAC008	SOG1	449
Arabidopsis	AT1G26870.1	ANAC009	FEZ	425
Arabidopsis	AT1G28470.1	ANAC010	SND3	314
Arabidopsis	AT1G32510.1	ANAC011		283
Arabidopsis	AT1G32770.1	ANAC012	NST3|SND1	358
Arabidopsis	AT1G32870.1	ANAC013	NTL1	528
Arabidopsis	AT1G33060.1	ANAC014	NTL2	648
Arabidopsis	AT1G33280.1	ANAC015	BRN1	305
Arabidopsis	AT1G34180.1	ANAC016	NTL3	564
Arabidopsis	AT1G34190.1	ANAC017	NTL7	557
Arabidopsis	AT1G52880.1	ANAC018	NAM	320
Arabidopsis	AT1G52890.1	ANAC019		317
Arabidopsis	AT1G54330.1	ANAC020		301
Arabidopsis	AT1G56010.1	ANAC021		257
Arabidopsis	AT1G56010.2	ANAC022	NAC1	324
Arabidopsis	AT1G60280.1	ANAC023		347
Arabidopsis	AT1G60350.1	ANAC024		320
Arabidopsis	AT1G61110.1	ANAC025		323
Arabidopsis	AT1G62700.1	ANAC026	VND5	394
Arabidopsis	AT1G64105.1	ANAC027		161
Arabidopsis	AT1G65910.1	ANAC028	NTL14	631
Arabidopsis	AT1G69490.1	ANAC029	NAP	268
Arabidopsis	AT1G71930.1	ANAC030	VND7	324
Arabidopsis	AT1G76420.1	ANAC031	CUC3	334
Arabidopsis	AT1G77450.1	ANAC032		253
Arabidopsis	AT1G79580.1	ANAC033	SMB	371
Arabidopsis	AT2G02450.1	ANAC034	AtLOV1	379
Arabidopsis	AT2G02450.2	ANAC035		414
Arabidopsis	AT2G17040.1	ANAC036		276
Arabidopsis	AT2G18060.1	ANAC037	VND1	365
Arabidopsis	AT2G24430.1	ANAC038		316
Arabidopsis	AT2G24430.2	ANAC039		316
Arabidopsis	AT2G27300.1	ANAC040	NTL8	335
Arabidopsis	AT2G33480.1	ANAC041		268
Arabidopsis	AT2G43000.1	ANAC042	JUB1	275
Arabidopsis	AT2G46770.1	ANAC043	NST1	365
Arabidopsis	AT3G01600.1	ANAC044		370
Arabidopsis	AT3G03200.1	ANAC045		479
Arabidopsis	AT3G04060.1	ANAC046		338
Arabidopsis	AT3G04070.1	ANAC047	SHYG	359
Arabidopsis	AT3G04420.1	ANAC048		342
Arabidopsis	AT3G04430.1	ANAC049		198
Arabidopsis	AT3G10480.1	ANAC050		447
Arabidopsis	AT3G10490.1	ANAC051		238
Arabidopsis	AT3G10490.2	ANAC052		451
Arabidopsis	AT3G10500.1	ANAC053	NTL4	549
Arabidopsis	AT3G15170.1	ANAC054	CUC1	310
Arabidopsis	AT3G15500.1	ANAC055	AtNAC3	317
Arabidopsis	AT3G15510.1	ANAC056	AtNAC2	364
Arabidopsis	AT3G17730.1	ANAC057		246
Arabidopsis	AT3G18400.1	ANAC058		314
Arabidopsis	AT3G29035.1	ANAC059	AtNAC3/ORS1	318
Arabidopsis	AT3G44290.1	ANAC060	NTL5	335
Arabidopsis	AT3G44350.1	ANAC061		228
Arabidopsis	AT3G49530.1	ANAC062	NTL6	469
Arabidopsis	AT3G55210.1	ANAC063		280
Arabidopsis	AT3G56530.1	ANAC064		319
Arabidopsis	AT3G56560.1	ANAC065		228
Arabidopsis	AT3G61910.1	ANAC066	NST2	334
Arabidopsis	AT4G01520.1	ANAC067		302
Arabidopsis	AT4G01540.1	ANAC068	NTM1/NTL12	473
Arabidopsis	AT4G01550.1	ANAC069	NTM2NTL13	457
Arabidopsis	AT4G10350.1	ANAC070	BRN2	341
Arabidopsis	AT4G17980.1	ANAC071		262
Arabidopsis	AT4G27410.2	ANAC072	RD26	297
Arabidopsis	AT4G28500.1	ANAC073	SND2	305
Arabidopsis	AT4G28530.1	ANAC074		352
Arabidopsis	AT4G29230.1	ANAC075	NTL15	498
Arabidopsis	AT4G36160.1	ANAC076	VND2	377
Arabidopsis	AT5G04400.1	ANAC077	NTL16	395
Arabidopsis	AT5G04410.1	ANAC078	NAC2/NTL11	567
Arabidopsis	AT5G07680.1	ANAC079	AtNAC4	329
Arabidopsis	AT5G07680.2	ANAC080	AtNAC4	315
Arabidopsis	AT5G08790.1	ANAC081	ATAF2	283
Arabidopsis	AT5G09330.1	ANAC082	VNI1	489
Arabidopsis	AT5G13180.1	ANAC083	VNI2	252
Arabidopsis	AT5G14000.1	ANAC084		206
Arabidopsis	AT5G14490.1	ANAC085		350
Arabidopsis	AT5G17260.1	ANAC086		476
Arabidopsis	AT5G18270.1	ANAC087		335
Arabidopsis	AT5G18300.1	ANAC088		147
Arabidopsis	AT5G22290.1	ANAC089	FSQ6/NTL17	340
Arabidopsis	AT5G22380.1	ANAC090		235
Arabidopsis	AT5G24590.2	ANAC091	TIP/NTL18	451
Arabidopsis	AT5G39610.1	ANAC092	AtNAC2/ORE1	285
Arabidopsis	AT5G39690.1	ANAC093		294
Arabidopsis	AT5G39820.1	ANAC094		334
Arabidopsis	AT5G41090.1	ANAC095		212
Arabidopsis	AT5G46590.1	ANAC096		292
Arabidopsis	AT5G50820.1	ANAC097		193
Arabidopsis	AT5G53950.1	ANAC098	CUC2	375
Arabidopsis	AT5G56620.1	ANAC099		386
Arabidopsis	AT5G61430.1	ANAC100	AtNAC5	336
Arabidopsis	AT5G62380.1	ANAC101	VND6	348
Arabidopsis	AT5G63790.1	ANAC102	MBK5.27	312
Arabidopsis	AT5G64060.1	ANAC103		356
Arabidopsis	AT5G64530.1	ANAC104	XND1	187
Arabidopsis	AT5G66300.1	ANAC105	VND3	292
Arabidopsis	AT1G02210.1	ANAC106#		87
Arabidopsis	AT1G19040.1	ANAC107		172
Arabidopsis	AT1G60240.1	ANAC108		175
Arabidopsis	AT1G60300.1	ANAC109		322
Arabidopsis	AT1G60340.1	ANAC110		371
Arabidopsis	AT1G60380.1	ANAC111		318
Arabidopsis	AT1G64100.2	ANAC112		806
Arabidopsis	AT3G12910.1	ANAC113		303
Arabidopsis	AT3G12977.1	ANAC114		279
Arabidopsis	AT3G56520.1	ANAC115		175
Arabidopsis	AT4G35580.1	ANAC116	CBNAC/NTL9	512
Rice	Os09g33490.1	ONAC001		247
Rice	Os03g60080.1	ONAC002	SNAC1	316
Rice	Os01g09550.1	ONAC003	SNAC3	486
Rice	Os04g38720.1	ONAC004	OsNAC2/OMTN2	343
Rice	Os08g42400.1	ONAC005		232
Rice	Os03g42630.1	ONAC006		323
Rice	Os06g04090.1	ONAC007	OsSWN1	395
Rice	Os04g43560.1	ONAC008		278
Rice	Os11g08210.1	ONAC009	OsNAC5	329
Rice	Os07g37920.1	ONAC010		425
Rice	Os06g46270.1	ONAC011	OMTN4	304
Rice	Os05g37080.1	ONAC012		274
Rice	Os02g15340.1	ONAC013		359
Rice	Os01g48446.1	ONAC014		290
Rice	Os07g48550.1	ONAC015		301
Rice	Os01g01430.1	ONAC016		340
Rice	Os11g05614.1	ONAC017		294
Rice	Os10g38834.1	ONAC018		341
Rice	Os06g01230.1	ONAC019		392
Rice	Os01g01470.1	ONAC020		320
Rice	Os09g12380.1	ONAC021		495
Rice	Os03g04070.1	ONAC022		316
Rice	Os02g12310.1	ONAC023	TMS5	252
Rice	Os05g34310.1	ONAC024		310
Rice	Os11g31330.1	ONAC025		300
Rice	Os01g29840.1	ONAC026		333
Rice	Os02g36880.2	ONAC027	OsNAC1/OMTN1	374
Rice	Os02g34970.1	ONAC028		204
Rice	Os08g02300.1	ONAC029	OsSWN2	400
Rice	Os01g23710.1	ONAC030#		none
Rice	Os08g01330.1	ONAC031	OsSWN3	324
Rice	Os02g56600.1	ONAC032		331
Rice	Os01g28050.1	ONAC033		265
Rice	Os01g48460.1	ONAC034#		none
Rice	Os01g59640.1	ONAC035		401
Rice	Os05g35170.1	ONAC036	IDEF2	449
Rice	Os08g06140.1	ONAC037	OsNTL2	729
Rice	Os01g71790.1	ONAC038		204
Rice	Os03g21030.1	ONAC039		358
Rice	Os08g44820.1	ONAC040	OsNTL5	656
Rice	Os01g70110.1	ONAC041		228
Rice	Os09g32040.1	ONAC042		702
Rice	Os02g06950.1	ONAC043		503
Rice	Os02g18460.1	ONAC044		503
Rice	Os11g03370.1	ONAC045		359
Rice	Os02g18470.1	ONAC046		558
Rice	AK068153	ONAC047		400
Rice	Os01g66120.1	ONAC048	OsNAC6|SNAC2	303
Rice	Os08g02160.1	ONAC049		334
Rice	Os02g38130.1	ONAC050		393
Rice	Os02g41450.1	ONAC051	OsNTL4	252
Rice	Os02g42970.1	ONAC052		370
Rice	Os02g51120.1	ONAC053#		none
Rice	Os03g02800.1	ONAC054	RIM1	650
Rice	Os03g01870.1	ONAC055		297
Rice	Os03g03540.1	ONAC056		366
Rice	Os03g12120.1	ONAC057		886
Rice	Os03g21060.1	ONAC058	OsNAP	392
Rice	Os01g64310.1	ONAC059		256
Rice	Os12g41680.1	ONAC060	OMTN3	333
Rice	Os10g21560.1	ONAC061		393
Rice	Os05g48850.1	ONAC062		314
Rice	Os08g33910.1	ONAC063		385
Rice	Os03g39050.1	ONAC064		442
Rice	Os07g27330.1	ONAC065		776
Rice	Os03g56580.1	ONAC066		362
Rice	Os07g12340.1	ONAC067	OsNAC3	276
Rice	Os01g60020.1	ONAC068	OsNAC4	318
Rice	Os03g39100.1	ONAC069		500
Rice	Os02g57650.1	ONAC070	OsNTL6	632
Rice	Os03g59730.1	ONAC071		496
Rice	Os09g32260.2	ONAC072		352
Rice	Os01g48130.2	ONAC073		333
Rice	Os01g15640.1	ONAC074	OsNTL3	489
Rice	Os01g66490.1	ONAC075		452
Rice	Os03g61249.1	ONAC076		316
Rice	Os03g61319.1	ONAC077		316
Rice	Os03g62470.1	ONAC078		131
Rice	Os04g35660.1	ONAC079		200
Rice	Os04g39960.1	ONAC080		282
Rice	Os04g40140.1	ONAC081*	BET1	E-low
Rice	Os04g45340.1	ONAC082*		E- low
Rice	Os04g52810.1	ONAC083		283
Rice	Os04g59470.1	ONAC084		285
Rice	Os05g10620.1	ONAC085		357
Rice	Os05g25960.1	ONAC086		567
Rice	Os05g34600.1	ONAC087		417
Rice	Os05g34830.1	ONAC088	OsNAC52	322
Rice	Os05g43960.1	ONAC089		494
Rice	Os06g01480.1	ONAC090	OsSWN7	364
Rice	Os06g15690.1	ONAC091		418
Rice	Os06g23650.1	ONAC092	OMTN5	373
Rice	Os06g33940.1	ONAC093	OsNAC7	376
Rice	Os06g36480.1	ONAC094		567
Rice	Os06g51070.1	ONAC095		292
Rice	Os07g04560.1	ONAC096		343
Rice	Os07g09740.1	ONAC097		664
Rice	Os07g09830.1	ONAC098		706
Rice	Os07g09860.1	ONAC099		678
Rice	Os07g13920.1	ONAC100		374
Rice	Os07g17180.1	ONAC101		605
Rice	Os07g27340.1	ONAC102		637
Rice	Os07g48450.1	ONAC103		346
Rice	Os08g10080.1	ONAC104	OMTN6	293
Rice	Os08g23880.1	ONAC105		447
Rice	Os08g33670.1	ONAC106		334
Rice	Os08g40030.1	ONAC107		340
Rice	Os09g24560.1	ONAC108		300
Rice	Os09g38000.1	ONAC109		366
Rice	Os09g38010.1	ONAC110		216
Rice	Os10g09820.1	ONAC111		496
Rice	Os10g25620.1	ONAC112		532
Rice	Os10g25630.1	ONAC113#		none
Rice	Os10g25640.1	ONAC114		195
Rice	Os10g26240.1	ONAC115		172
Rice	Os10g26250.1	ONAC116#		none
Rice	Os10g26270.1	ONAC117		414
Rice	Os10g27360.1	ONAC118		421
Rice	Os10g27390.1	ONAC119		543
Rice	Os10g33760.1	ONAC120		324
Rice	Os10g42130.1	ONAC121		329
Rice	Os11g03300.1	ONAC122		391
Rice	Os11g03310.1	ONAC123	OsNAC10	288
Rice	Os11g04470.1	ONAC124		358
Rice	Os11g04960.1	ONAC125		451
Rice	Os11g07700.1	ONAC126		267
Rice	Os11g31340.1	ONAC127		277
Rice	Os11g31360.1	ONAC128		290
Rice	Os11g31380.1	ONAC129		240
Rice	Os11g45950.1	ONAC130		136
Rice	Os12g03040.1	ONAC131	OsNAC10	393
Rice	Os12g03050.1	ONAC132	ONAC300	396
Rice	Os12g04230.1	ONAC133		365
Rice	Os12g05990.1	ONAC134		307
Rice	Os12g07790.1	ONAC135		571
Rice	Os12g22630.1	ONAC136		470
Rice	Os12g22940.1	ONAC137		417
Rice	Os12g23090.1	ONAC138		404
Rice	Os12g29330.1	ONAC139		260
Rice	Os12g43530.1	ONAC140		375
Rice	Os01g47670.1	ONAC141		364
Rice	Os03g61650.1	ONAC142		364
Rice	Os05g26026.1	ONAC143		320
Rice	Os05g26049.1	ONAC144		320
Rice	Os05g27749.1	ONAC145		405
Rice	Os05g28129.1	ONAC146#		none
Rice	Os07g31410.1	ONAC147		211
Rice	Os10g27380.1	ONAC148		375
Rice	Os11g04360.1	ONAC149		427
Grape	GSVIVT01000940001	VvNAC01		251
Grape	GSVIVT01001264001	VvNAC02		320
Grape	GSVIVT01006485001	VvNAC03		331
Grape	GSVIVT01007194001	VvNAC04		279
Grape	GSVIVT01007982001	VvNAC05		284
Grape	GSVIVT01008291001	VvNAC06		327
Grape	GSVIVT01008601001	VvNAC07		209
Grape	GSVIVT01008839001	VvNAC08		263
Grape	GSVIVT01009651001	VvNAC09		355
Grape	GSVIVT01011420001	VvNAC10		353
Grape	GSVIVT01011445001	VvNAC11		290
Grape	GSVIVT01011954001	VvNAC12		430
Grape	GSVIVT01013182001	VvNAC13		365
Grape	GSVIVT01013419001	VvNAC14		320
Grape	GSVIVT01013671001	VvNAC15		572
Grape	GSVIVT01014287001	VvNAC16		346
Grape	GSVIVT01014403001	VvNAC17		333
Grape	GSVIVT01014405001	VvNAC18		331
Grape	GSVIVT01015274001	VvNAC19		454
Grape	GSVIVT01016175001	VvNAC20		559
Grape	GSVIVT01016176001	VvNAC21		385
Grape	GSVIVT01018623001	VvNAC22		345
Grape	GSVIVT01018809001	VvNAC23		274
Grape	GSVIVT01019670001	VvNAC24		357
Grape	GSVIVT01019702001	VvNAC25		632
Grape	GSVIVT01019952001	VvNAC26		282
Grape	GSVIVT01019993001	VvNAC27		385
Grape	GSVIVT01020384001	VvNAC28		295
Grape	GSVIVT01020387001	VvNAC29		214
Grape	GSVIVT01020388001	VvNAC30		277
Grape	GSVIVT01020389001	VvNAC31		277
Grape	GSVIVT01020394001	VvNAC32		284
Grape	GSVIVT01020478001	VvNAC33		295
Grape	GSVIVT01020609001	VvNAC34		303
Grape	GSVIVT01020649001	VvNAC35		480
Grape	GSVIVT01020834001	VvNAC36		298
Grape	GSVIVT01021120001	VvNAC37		311
Grape	GSVIVT01021137001	VvNAC38		484
Grape	GSVIVT01022354001	VvNAC39		265
Grape	GSVIVT01023123001	VvNAC40		204
Grape	GSVIVT01023921001	VvNAC41		279
Grape	GSVIVT01025165001	VvNAC42		376
Grape	GSVIVT01025244001	VvNAC43		364
Grape	GSVIVT01025515001	VvNAC44		297
Grape	GSVIVT01025657001	VvNAC45		349
Grape	GSVIVT01026055001	VvNAC46		225
Grape	GSVIVT01026468001	VvNAC47		198
Grape	GSVIVT01026495001	VvNAC48		560
Grape	GSVIVT01027431001	VvNAC49		352
Grape	GSVIVT01027467001	VvNAC50		128
Grape	GSVIVT01027470001	VvNAC51		202
Grape	GSVIVT01027472001	VvNAC52		218
Grape	GSVIVT01027473001	VvNAC53		455
Grape	GSVIVT01027475001	VvNAC54		994
Grape	GSVIVT01027477001	VvNAC55		335
Grape	GSVIVT01028354001	VvNAC56		281
Grape	GSVIVT01029392001	VvNAC57		238
Grape	GSVIVT01029709001	VvNAC58		192
Grape	GSVIVT01032388001	VvNAC59		398
Grape	GSVIVT01033372001	VvNAC60		661
Grape	GSVIVT01033374001	VvNAC61		390
Grape	GSVIVT01033886001	VvNAC62		217
Grape	GSVIVT01034485001	VvNAC63		313
Grape	GSVIVT01035214001	VvNAC64		634
Grape	GSVIVT01035554001	VvNAC65		325
Grape	GSVIVT01035959001	VvNAC66		164
Grape	GSVIVT01036071001	VvNAC67		375
Grape	GSVIVT01036682001	VvNAC68		272
Grape	GSVIVT01036711001	VvNAC69		281
Grape	GSVIVT01037113001	VvNAC70		323
Grape	GSVIVT01038666001	VvNAC71		578
Grape	GSVIVT01019582001	VvNAC72		312
Grape	GSVIVT01033032001	VvNAC73		162
Grape	GSVIVT01036091001	VvNAC74		232
